# Supplementary material
Source: HighWire-hosted journal article supplement (https://cmaj.ca/highwire/filestream/58821/field_highwire_adjunct_files/3/tonsil-kosken-4-at.pdf)
Supplement: tonsil-kosken-4-at.pdf [file tonsil-kosken-4-at.pdf]

**Appendix 4 (as supplied by the authors): Glasgow Benefit Inventory (GBI) total score and subscale scores findings in adults with recurrent tonsillitis randomised to immediate tonsillectomy**

Figures are means (SDs).\*

| GBI score <sup>†</sup> | Tonsillectomy |
|------------------------|---------------|
| GBI total              | 27.1 (11.5)   |
| GBI general            | 23.0 (14.8)   |
| GBI social             | 2.7 (11.5)    |
| GBI physical           | 68.2 (27.7)   |

\*<sup>1</sup>) SD = standard deviation. <sup>†</sup>) Data missing in 3 patients.
